# Supplementary material
Source: publisher figshare collection journal article supplement (https://acs.figshare.com/ndownloader/files/3915718)
Supplement: Supplementary file 1 [file 3915718]

## Supporting Information

### Cinnamic Anilides as New Mitochondrial Permeability Transition Pore Inhibitors Endowed with Ischemia-Reperfusion Injury Protective Effect in Vivo

*Daniele Fancelli<sup>†##</sup>, Agnese Abate<sup>‡○</sup>, Raffaella Amici<sup>†#</sup>, Paolo Bernardi<sup>§</sup>, Marco Ballarini<sup>†||</sup>, Anna Cappa<sup>‡#</sup>, Giacomo Carenzi<sup>‡□</sup>, Andrea Colombo<sup>⊥◊</sup>, Cristina Contursi<sup>†=</sup>, Fabio Di Lisa<sup>|</sup>, Giulio Dondio<sup>⊥~</sup>, Stefania Gagliardi<sup>⊥f</sup>, Eva Milanese<sup>†</sup>, Saverio Minucci<sup>||T</sup>, Gilles Pain<sup>††</sup>, Pier Giuseppe Pelicci<sup>||</sup>, Alessandra Sacconi<sup>††</sup>, Mariangela Storto<sup>†||</sup>, Florian Thaler<sup>†#</sup>, Mario Varasi<sup>‡#</sup>, Manuela Villa<sup>†#</sup> and Simon Plyte<sup>†Δ</sup>.*

<sup>†</sup>Genextra Group, Congenia s.r.l., Via Adamello 16, 20139 Milan (Italy);

<sup>‡</sup>Genextra Group, DAC s.r.l., Via Adamello 16, 20139 Milan (Italy);

<sup>||</sup>Department of Experimental Oncology, European Institute of Oncology IEO, Via Adamello 16, 20139 Milan, Italy;

<sup>T</sup>Department of Biosciences, University of Milan, 20100 Milan, Italy;

<sup>§</sup>Department of Biomedical Sciences, University of Padua, Via Ugo Bassi 58/B, 35121 Padua (PD), Italy;

<sup>|</sup> Department of Biomedical Sciences, University of Padua, Viale G. Colombo 3, 35131 Padua, Italy.

<sup>⊥</sup>NiKem Research s.r.l., Via Zambelletti 25, 20021 Baranzate (MI), Italy;

|                                                                                                                           |     |
|---------------------------------------------------------------------------------------------------------------------------|-----|
| HPLC purity of target compounds.....                                                                                      | S2  |
| Analytical characterization of compounds <b>6</b> ( <sup>1</sup> H NMR, UPLC ).....                                       | S4  |
| Analytical characterization of compounds <b>22</b> ( <sup>1</sup> H NMR, UPLC).....                                       | S5  |
| Reactivity Assay of compound <b>22</b> with N-Acetyl Cysteine or Glutathione.....                                         | S6  |
| <i>In vitro</i> selectivity assays (cmpd. <b>22</b> ).....                                                                | S8  |
| Synthesis and characterization of compounds prepared in analogy to the procedures described in the experimental part..... | S12 |
| Plasma concentration of compound <b>22</b> in the rat telemetry study.....                                                | S18 |
| CRC of mouse liver mitochondria after incubation with 0.1, 0.5 and 5 μM inhibitor....                                     | S19 |

### **HPLC purity of target compounds**

**Method 1:** Waters Acquity UPLC, Waters SQD single quadrupole. Column Acquity UPLC-BEH C18 50 x 2.1 mm x 1.7  $\mu$ m. Flow rate: 0.6 ml/min. Mobile phase: A phase= water/CH<sub>3</sub>CN 95/5 + 0.07% formic acid; B phase= CH<sub>3</sub>CN + 0.05% formic acid. Gradient: 0 min (A: 98%, B: 2%), 3 min (A: 0%, B: 100%), 3.5 min (A: 0%, B: 100%). UV detection wavelength: 254 nm. Injection volume: 0.5  $\mu$ l

**Method 2:** Waters Acquity UPLC, Waters SQD single quadrupole. Column Acquity UPLC-BEH C18 50 x 2.1 mm x 1.7  $\mu$ m. Flow rate: 0.6 ml/min. Mobile phase: A phase= water/CH<sub>3</sub>CN 95/5 + 0.07% formic acid; B phase= CH<sub>3</sub>CN + 0.05% formic acid. Gradient: 0 min (A: 80%, B: 20%), 5 min (A: 30%, B: 70%). UV detection wavelength: 254 nm. Injection volume: 0.5  $\mu$ l.

**Method 3:** Agilent 1100 HPLC, ion-trap Esquire 3000<sup>+</sup> with ESI (Bruker). Column Supelco Discovery 150 x 4.6 mm, 5  $\mu$ m. Flow rate: 1.0 ml/min. Mobile phase: A phase= water + 0.05% TFA; B phase= CH<sub>3</sub>CN + 0.05% TFA. Gradient: 0 min (A: 95%, B: 5%), 15 min (A: 50%, B: 50%). UV detection wavelength: 254 nm.

**Method 4:** Waters Acquity UPLC, Micromass ZQ 2000 Single quadrupole (Waters). Column Acquity UPLC-BEH C18 50 x 2.1 mm x 1.7  $\mu$ m. Flow rate: 0.6 ml/min. Mobile phase: A phase= water/CH<sub>3</sub>CN 95/5 + 0.1% TFA; B phase= water/CH<sub>3</sub>CN 5/95 + 0.1% TFA. Gradient: 0-0.25min (A: 95%, B: 5%), 0.25-3.30 min (A: 0%, B: 100%), 3.30-4.00 min (A: 0%, B: 100%). UV detection wavelength: 254 nm. Injection volume: 2  $\mu$ l

**Method 5:** Agilent 1100 HPLC, ion-trap Esquire 3000<sup>+</sup> with ESI (Bruker). Column Supelco Discovery 150 x 4.6 mm, 5  $\mu$ m. Flow rate: 1.0 ml/min. Mobile phase: A phase= water + 0.05% TFA; B phase= CH<sub>3</sub>CN + 0.05% TFA. Gradient: 0 min (A: 80%, B: 20%), 15 min (A: 0%, B: 90%). UV detection wavelength: 254 nm.

| Compound | Purity<br>(raw area % at 254 nm) | Method | Retention time<br>(min) |
|----------|----------------------------------|--------|-------------------------|
| 3        | 100                              | 2      | 1.78                    |
| 4        | 99                               | 1      | 1.81                    |
| 5        | 100                              | 2      | 2.18                    |
| 6        | 100                              | 1      | 1.75                    |
| 7        | 95                               | 1      | 1.61                    |
| 8        | 98                               | 5      | 11.4                    |
| 9        | 99                               | 1      | 2.05                    |
| 10       | 90                               | 5      | 7.30                    |
| 11       | 90                               | 3      | 10.6                    |
| 12       | 99                               | 5      | 11.7                    |
| 13       | 100                              | 1      | 1.88                    |
| 14       | 100                              | 1      | 1.47                    |
| 15       | 100                              | 5      | 10.79                   |
| 16       | 99                               | 5      | 8.77                    |
| 17       | 100                              | 5      | 10.67                   |
| 18       | 99                               | 5      | 3.93                    |
| 19       | 100                              | 5      | 4.73                    |
| 20       | 100                              | 5      | 9.80                    |
| 21       | 100                              | 5      | 10.3                    |
| 22       | 99                               | 1      | 1.68                    |
| 23       | 100                              | 1      | 1.78                    |
| 24       | 97                               | 5      | 5.38                    |
| 25       | 99                               | 5      | 11.87                   |
| 26       | 100                              | 5      | 9.55                    |
| 27       | 100                              | 5      | 10.95                   |
| 28       | 98                               | 5      | 9.16                    |
| 29       | 97                               | 1      | 1.8                     |
| 30       | 100                              | 5      | 9.71                    |
| 31       | 95                               | 1      | 1.47                    |
| 32       | 100                              | 1      | 1.38                    |
| 33       | 98                               | 1      | 1.2                     |
| 34       | 100                              | 5      | 9.96                    |
| 37       | 99                               | 5      | 11.02                   |
| 41       | 95                               | 1      | 1.53                    |
| 44       | 98                               | 5      | 11.7                    |
| 46       | 100                              | 5      | 9.95                    |

# <sup>1</sup>H NMR and UPLC traces of compound 6

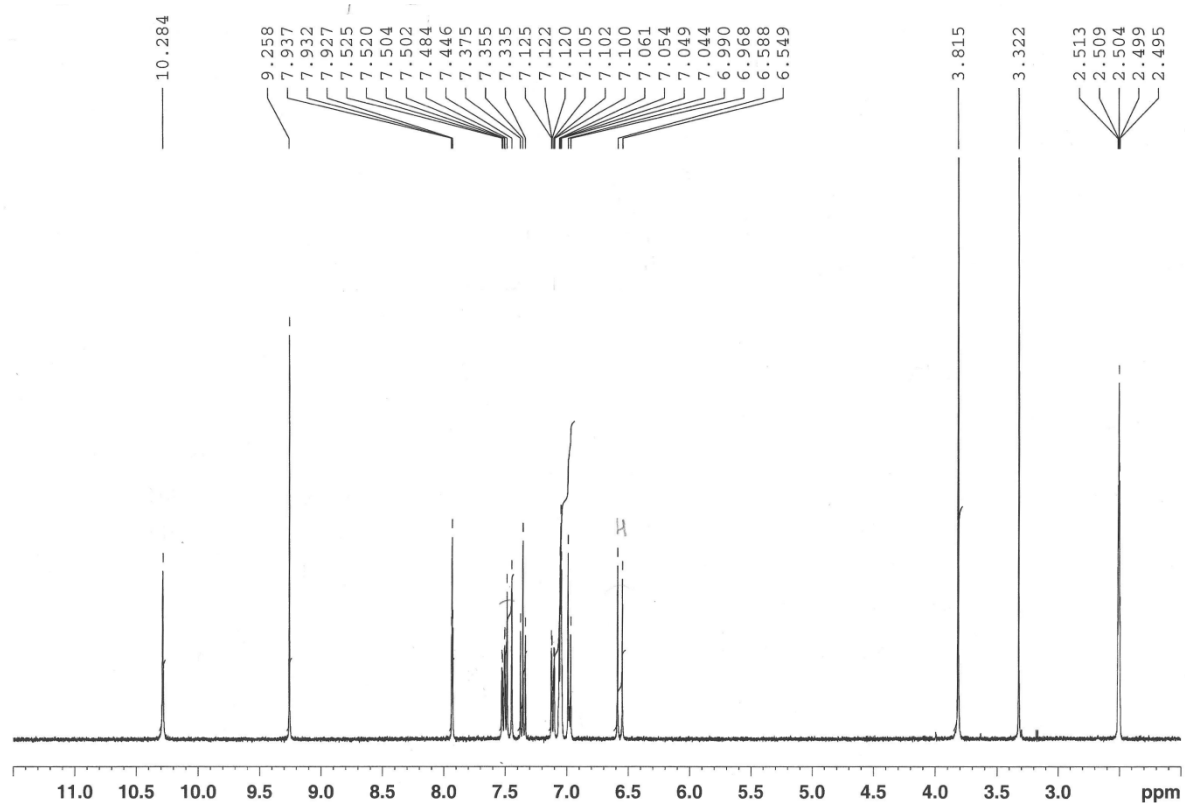

3: UV Detector: TIC Smooth (Mn, 2x3)

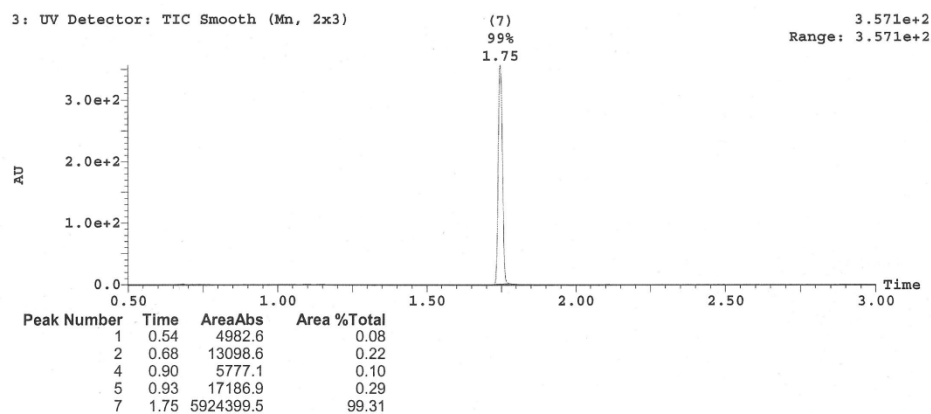

3: UV Detector: 254

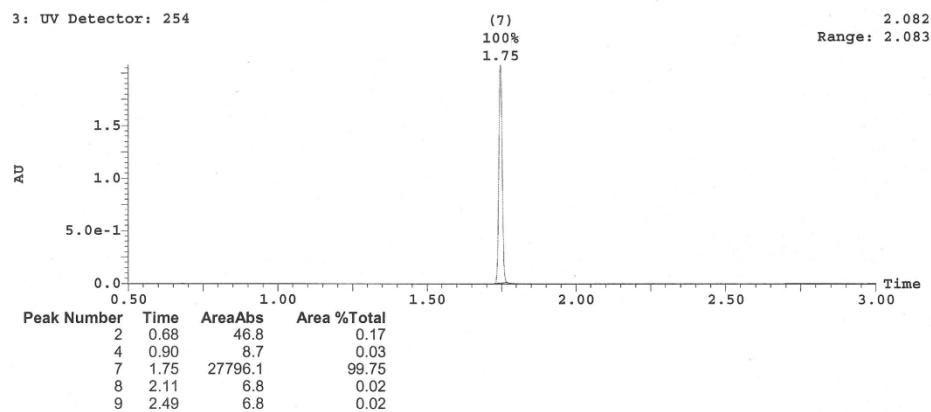

# <sup>1</sup>H NMR and UPLC traces of compound 22

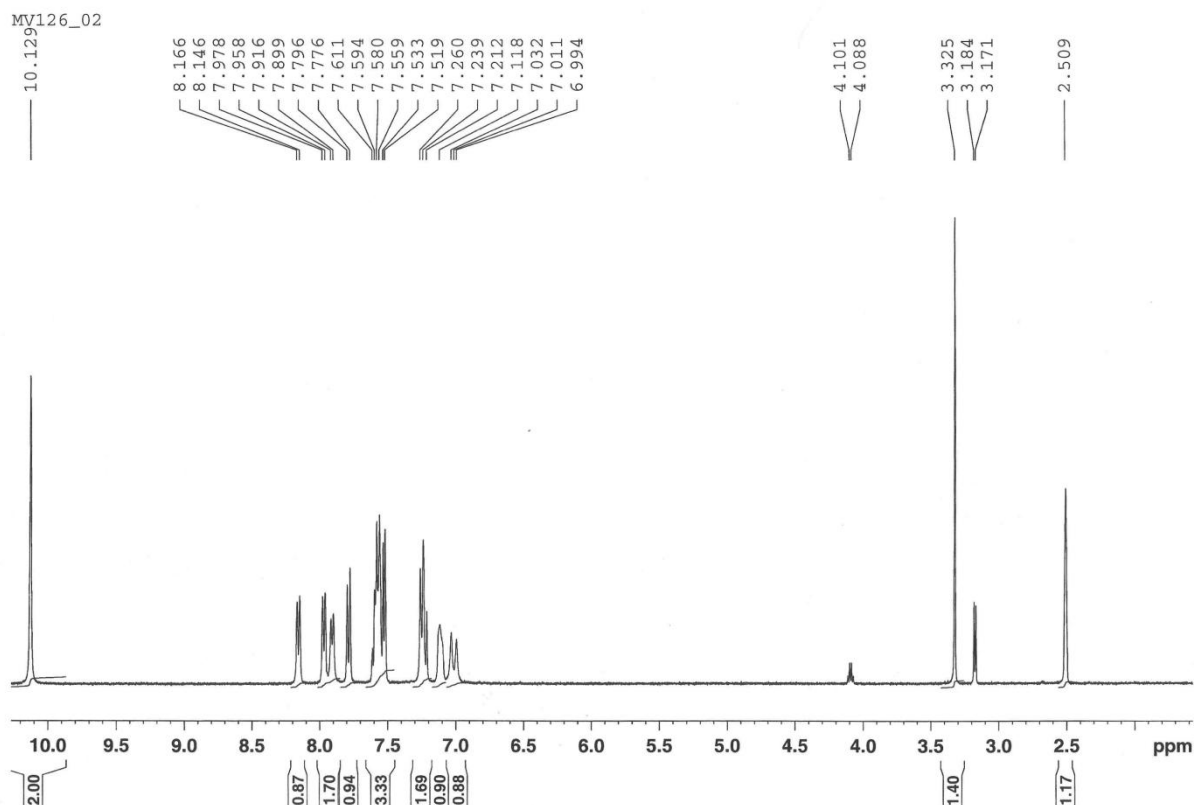

3: UV Detector: TIC Smooth (Mn, 2x3)

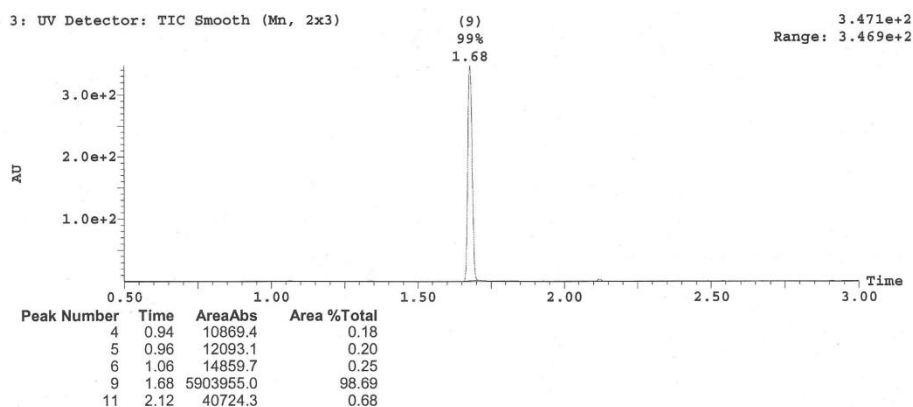

3: UV Detector: 254

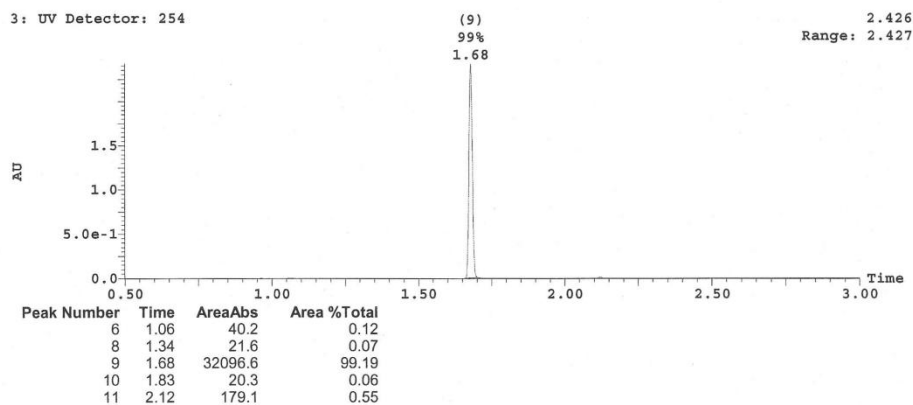

## Reactivity Assay of compound **22** with *N*-Acetyl Cysteine or Glutathione

**General Protocol:** 10  $\mu$ L of compound **22** (10 mM stock solution in DMSO) and 10  $\mu$ L of *N*-acetyl Cysteine (10 mM stock solution in DMSO) or Glutathione (10 mM stock solution in water) were diluted with 980  $\mu$ L of a PBS/DMSO (2:1, v:v) and incubated at 25 °C for 24 h. The samples were analyzed by UPLC by injecting 7.5  $\mu$ L of the standard solution after 0 and 24 h. Analytical Method: Method 1, HPLC/UV or HPLC/MS, without calibration curve.

**Data Analysis:** The samples were evaluated by comparing the AUC of the test solution in comparison with a stock solution of compound **22** (100  $\mu$ M) in PBS/DMSO (2:1, v:v) as well as by MS. As shown in Figures S1 and S2 only the peak of compound **22** in UV and MS was detected and no NAC or glutathione adduct was detectable under the experimental conditions.

**A**

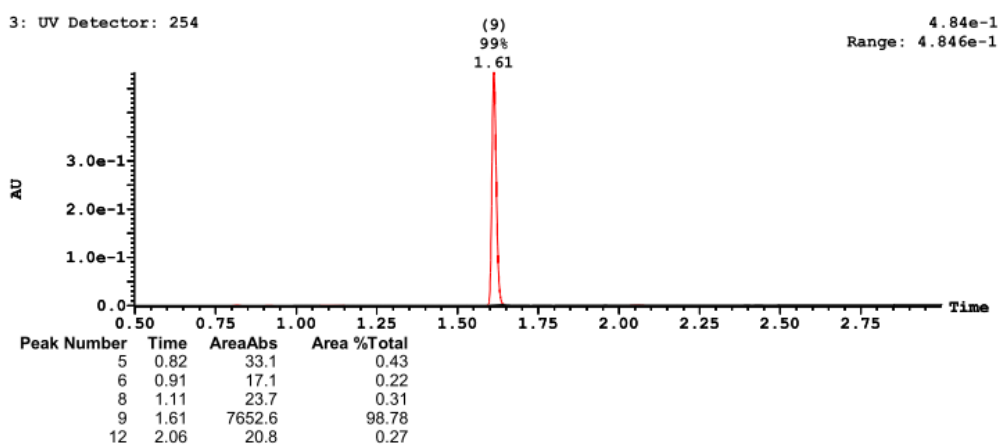

**B**

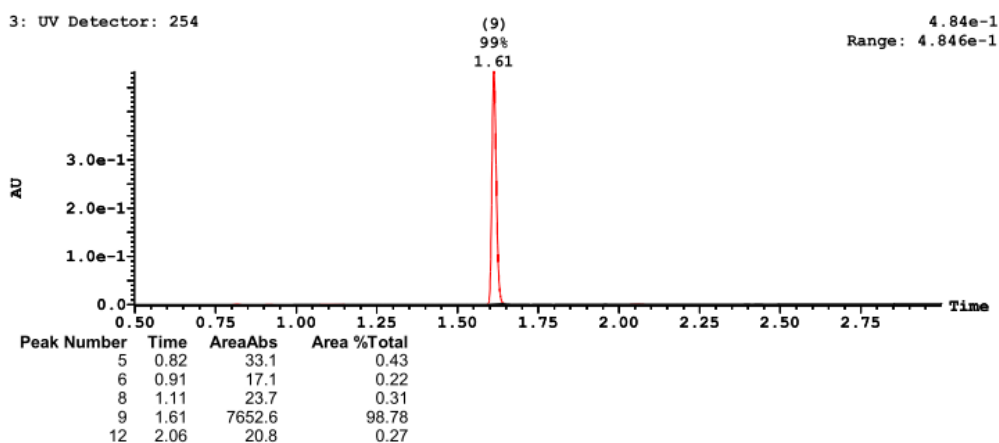

**Figure S1** UPLC analyses (UV absorption at 254 nm) of compound **22** (chromatogram A) and compound **22** after 24h incubation with glutathione (chromatogram B; glutathione.....)

**A**

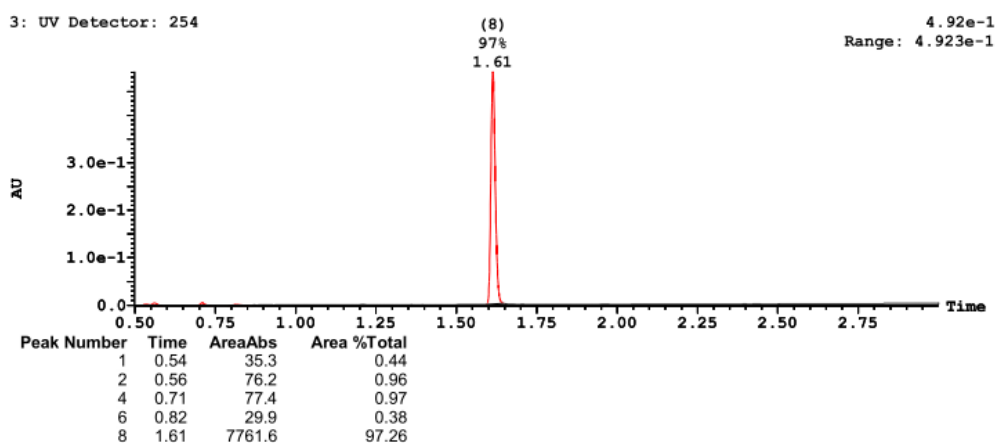

**B**

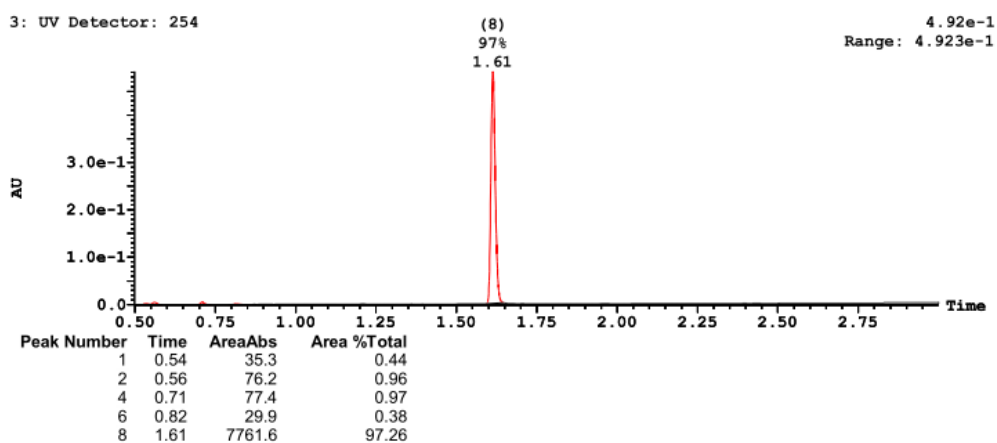

**Figure S2** UPLC analyses (UV absorption at 254 nm) of compound **22** (chromatogram A) and compound **22** after 24h incubation with N-acetyl-cystein (chromatogram B; N-acetyl-cystein.....)

### ***In Vitro* Pharmacology: Binding Assays**

Summary Results of compound **22** tested at 10  $\mu$ M

| Assay                                                                   | % inhibition of control<br>specific binding |
|-------------------------------------------------------------------------|---------------------------------------------|
| A <sub>1</sub> ( <i>h</i> ) (antagonist radioligand)                    | 40                                          |
| A <sub>2A</sub> ( <i>h</i> ) (agonist radioligand)                      | 43                                          |
| A <sub>3</sub> ( <i>h</i> ) (agonist radioligand)                       | 13                                          |
| $\alpha_1$ (non-selective) (antagonist radioligand)                     | 5                                           |
| $\alpha_2$ (non-selective) (antagonist radioligand)                     | -12                                         |
| $\beta_1$ ( <i>h</i> ) (agonist radioligand)                            | 6                                           |
| $\beta_2$ ( <i>h</i> ) (agonist radioligand)                            | 0                                           |
| AT <sub>1</sub> ( <i>h</i> ) (antagonist radioligand)                   | -2                                          |
| AT <sub>2</sub> ( <i>h</i> ) (agonist radioligand)                      | -6                                          |
| BZD (central) (agonist radioligand)                                     | 3                                           |
| B <sub>1</sub> ( <i>h</i> ) (agonist radioligand)                       | 2                                           |
| B <sub>2</sub> ( <i>h</i> ) (agonist radioligand)                       | -7                                          |
| CB <sub>1</sub> ( <i>h</i> ) (agonist radioligand)                      | -6                                          |
| CB <sub>2</sub> ( <i>h</i> ) (agonist radioligand)                      | -9                                          |
| CCK <sub>1</sub> (CCK <sub>A</sub> ) ( <i>h</i> ) (agonist radioligand) | 32                                          |
| CCK <sub>2</sub> (CCK <sub>B</sub> ) ( <i>h</i> ) (agonist radioligand) | 6                                           |
| CRF <sub>1</sub> ( <i>h</i> ) (agonist radioligand)                     | 13                                          |
| D <sub>1</sub> ( <i>h</i> ) (antagonist radioligand)                    | -7                                          |
| D <sub>2S</sub> ( <i>h</i> ) (antagonist radioligand)                   | 4                                           |
| D <sub>3</sub> ( <i>h</i> ) (antagonist radioligand)                    | 0                                           |
| D <sub>4.4</sub> ( <i>h</i> ) (antagonist radioligand)                  | 36                                          |
| ET <sub>A</sub> ( <i>h</i> ) (agonist radioligand)                      | -2                                          |
| ET <sub>B</sub> ( <i>h</i> ) (agonist radioligand)                      | 12                                          |



|                                                                                                                        |     |
|------------------------------------------------------------------------------------------------------------------------|-----|
| <b>GABA (non-selective) (agonist radioligand)</b>                                                                      | 5   |
| <b>AMPA (agonist radioligand)</b>                                                                                      | 2   |
| <b>kainate (agonist radioligand)</b>                                                                                   | 13  |
| <b>NMDA (antagonist radioligand)</b>                                                                                   | 3   |
| <b>H<sub>1</sub> (<i>h</i>) (antagonist radioligand)</b>                                                               | -6  |
| <b>H<sub>2</sub> (<i>h</i>) (antagonist radioligand)</b>                                                               | 18  |
| <b>H<sub>3</sub> (<i>h</i>) (agonist radioligand)</b>                                                                  | 9   |
| <b>I<sub>2</sub> (antagonist radioligand)</b>                                                                          | -12 |
| <b>BLT<sub>1</sub> (LTB<sub>4</sub>) (<i>h</i>) (agonist radioligand)</b>                                              | 0   |
| <b>CysLT<sub>1</sub> (LTD<sub>4</sub>) (<i>h</i>) (agonist radioligand)</b>                                            | 10  |
| <b>MC<sub>4</sub> (<i>h</i>) (agonist radioligand)</b>                                                                 | -1  |
| <b>M (non-selective) (antagonist radioligand)</b>                                                                      | 13  |
| <b>NK<sub>1</sub> (<i>h</i>) (agonist radioligand)</b>                                                                 | -8  |
| <b>NK<sub>2</sub> (<i>h</i>) (agonist radioligand)</b>                                                                 | 6   |
| <b>NK<sub>3</sub> (<i>h</i>) (antagonist radioligand)</b>                                                              | 10  |
| <b>Y (non-selective) (agonist radioligand)</b>                                                                         | -3  |
| <b>N neuronal <math>\alpha</math>-BGTX-insensitive (<math>\alpha</math>4<math>\beta</math>2) (agonist radioligand)</b> | 19  |
| <b>opioid (non-selective) (antagonist radioligand)</b>                                                                 | 7   |
| <b>NOP (ORL1) (<i>h</i>) (agonist radioligand)</b>                                                                     | -11 |
| <b>PPAR<math>\gamma</math> (<i>h</i>) (agonist radioligand)</b>                                                        | -1  |
| <b>PCP (antagonist radioligand)</b>                                                                                    | -6  |
| <b>EP<sub>4</sub> (<i>h</i>) (agonist radioligand)</b>                                                                 | 4   |
| <b>IP (PGI<sub>2</sub>) (<i>h</i>) (agonist radioligand)</b>                                                           | -4  |
| <b>P2X (agonist radioligand)</b>                                                                                       | -8  |
| <b>P2Y (agonist radioligand)</b>                                                                                       | -3  |
| <b>5-HT (non-selective) (agonist radioligand)</b>                                                                      | 18  |
| <b><math>\sigma</math> (non-selective) (agonist radioligand)</b>                                                       | 4   |

|                                                                                          |     |
|------------------------------------------------------------------------------------------|-----|
| GR ( <i>h</i> ) (agonist radioligand)                                                    | 0   |
| PR ( <i>h</i> ) (agonist radioligand)                                                    | -15 |
| AR ( <i>h</i> ) (agonist radioligand)                                                    | -5  |
| TRH <sub>1</sub> ( <i>h</i> ) (agonist radioligand)                                      | -14 |
| V <sub>1a</sub> ( <i>h</i> ) (agonist radioligand)                                       | 8   |
| V <sub>2</sub> ( <i>h</i> ) (agonist radioligand)                                        | 3   |
| Ca <sup>2+</sup> channel (L, dihydropyridine site) (antagonist radioligand)              | 7   |
| Ca <sup>2+</sup> channel (L, diltiazem site) (benzothiazepines) (antagonist radioligand) | -24 |
| Ca <sup>2+</sup> channel (L, verapamil site) (phenylalkylamine) (antagonist radioligand) | 12  |
| K <sub>ATP</sub> channel (antagonist radioligand)                                        | 10  |
| K <sub>V</sub> channel (antagonist radioligand)                                          | -3  |
| SK <sub>Ca</sub> channel (antagonist radioligand)                                        | -8  |
| Na <sup>+</sup> channel (site 2) (antagonist radioligand)                                | -1  |
| Cl <sup>-</sup> channel (GABA-gated) (antagonist radioligand)                            | 10  |
| norepinephrine transporter ( <i>h</i> ) (antagonist radioligand)                         | 85  |
| dopamine transporter ( <i>h</i> ) (antagonist radioligand)                               | 18  |
| GABA transporter (antagonist radioligand)                                                | -5  |
| choline transporter (CHT1) ( <i>h</i> ) (antagonist radioligand)                         | -4  |
| 5-HT transporter ( <i>h</i> ) (antagonist radioligand)                                   | 4   |

### *In Vitro* Pharmacology: Enzyme Assays

Summary Results of compound **22** tested at 10  $\mu$ M

| Assay              | % Inhibition of Control Values |
|--------------------|--------------------------------|
| PDE1B ( <i>h</i> ) | 2                              |
| PDE2A ( <i>h</i> ) | 2                              |
| PDE3A ( <i>h</i> ) | -4                             |
| PDE4D ( <i>h</i> ) | -1                             |

|                                                       |     |
|-------------------------------------------------------|-----|
| <b>PDE5 (<i>h</i>) (non-selective)</b>                | -2  |
| <b>PKC<math>\alpha</math> (<i>h</i>)</b>              | 23  |
| <b>acetylcholinesterase (<i>h</i>)</b>                | 1   |
| <b>COMT (catechol- O-methyl transferase)</b>          | 8   |
| <b>GABA transaminase</b>                              | 2   |
| <b>MAO-A (<i>h</i>)</b>                               | 3   |
| <b>MAO-B (<i>h</i>)</b>                               | -3  |
| <b>PNMT (phenylethanolamine N-methyl transferase)</b> | -10 |
| <b>tyrosine hydroxylase</b>                           | -8  |
| <b>ATPase (Na<sup>+</sup>/K<sup>+</sup>)</b>          | 0   |

---

## Synthesis and characterization of compounds prepared in analogy to the procedures described in the experimental part

### (E)-N-(3-Chlorophenyl)-3-(4-hydroxyphenyl)-prop-2-enamide (5)

Cinnamic anilide **5** was obtained by coupling 4-hydroxycinnamic acid **1c** (500 mg, 3.05 mmol) and 3-chloroaniline **2a** (0.27 mL, 2.57 mmol) according to the procedure described for the preparation of **3**. Purification by trituration in DCM afforded ((E)-N-(3-chlorophenyl)-3-(4-hydroxyphenyl)-prop-2-enamide **5** (370 mg 44%) as a white powder.

<sup>1</sup>H NMR (400 MHz, DMSO-d<sub>6</sub>) δ 10.30 (bs, 1H), 9.58 (bs, 1H), 7.94 (m, 1H), 7.42 (m, 5H), 7.11 (m, 1H), 6.83 (m, 2H), 6.58 (d, J = 15.6 Hz, 1H). m/z (ES<sup>+</sup>), (M + H)<sup>+</sup> = 274.

### (E)-N-(3-Chlorophenyl)-3-(3-hydroxy-4-methoxyphenyl)-prop-2-enamide (6)

Cinnamic anilide **6** was obtained by coupling 3-hydroxy-4-methoxycinnamic acid **1d** (515 mg, 2.57 mmol) and 3-chloroaniline **2a** (0.27 mL, 2.57 mmol) according to the procedure described for the preparation of **4**. Purification by flash silica chromatography (n-hexane/ EtOAc 70:30) afforded (E)-N-(3-chlorophenyl)-3-(3-hydroxy-4-methoxy-phenyl)-prop-2-enamide **6** (280 mg 36%) as a white powder.

<sup>1</sup>H NMR (400 MHz, DMSO-d<sub>6</sub>) δ 10.28 (s, 1H), 9.26 (s, 1H), 7.93 (m, 1H), 7.50 (m, 1H), 7.46 (d, J = 15.4 Hz, 1H), 7.35 (m, 1H), 7.12 (m, 1H), 7.10-6.97 (m, 3H), 6.57 (d, J = 15.4 Hz, 1H), 3.81 (s, 3H). m/z (ES<sup>+</sup>), (2M + Na)<sup>+</sup> = 629.

### (E)-N-(3-Chlorophenyl)-3-(4-hydroxy-3-methoxyphenyl)-prop-2-enamide (7)

Cinnamic anilide **7** was obtained by coupling 4-hydroxy-3-methoxycinnamic acid **1e** (500 mg, 2.57 mmol) and 3-chloroaniline **2a** (0.27 mL, 2.57 mmol) according to the procedure described for the preparation of **3**. Purification by flash silica chromatography (elution gradient: 10% to 30% EtOAc in n-hexane) afforded (E)-N-(3-chlorophenyl)-3-(4-hydroxy-3-methoxyphenyl)-prop-2-enamide **7** (391 mg 50%) as a white powder.

<sup>1</sup>H NMR (400 MHz, DMSO-d<sub>6</sub>) δ 10.26 (s, 1H), 9.54 (s, 1H), 7.94 (m, 1H), 7.42 (m, 2H), 7.35 (m, 1H), 7.20-7.09 (m, 3H), 6.83 (m, 1H), 6.59 (d, J = 15.6 Hz, 1H), 3.83 (s, 3H). m/z (ES<sup>+</sup>), (M + Na)<sup>+</sup> = 326.

### (E)-N-(3-Chlorophenyl)-3-(3,4-dimethoxyphenyl)-prop-2-enamide (8)

Cinnamic anilide **8** was obtained by coupling 3,4-dimethoxycinnamic acid **1f** (500 mg, 2.4 mmol) and 3-chloroaniline **2a** (0.21 mL, 1.99 mmol) according to the procedure described for the preparation of **4**. Purification by flash silica chromatography (elution gradient: 30% to 40% EtOAc in n-hexane) afforded (E)-N-(3-chlorophenyl)-3-(3,4-dimethoxyphenyl)-prop-2-enamide **8** (409 mg 65%) as a white powder.

<sup>1</sup>H NMR (400 MHz, DMSO-d<sub>6</sub>) δ 10.32 (s, 1H), 7.94 (m, 1H), 7.57-7.51 (m, 2H), 7.35 (m, 1H), 7.23-7.19 (m, 2H), 7.13-7.10 (m, 1H), 7.02 (m, 1H), 6.67 (d, J = 15.6, 1H), 3.82 (s, 3H), 3.80 (s, 3H). m/z (ES<sup>+</sup>), (2M + Na)<sup>+</sup> = 657.

### (E)-N-(3-Chlorophenyl)-3-(3-fluorophenyl)-prop-2-enamide (9)

Cinnamic anilide **9** was obtained by coupling 3-fluorocinnamic acid **1g** (500 mg, 3.01 mmol) and 3-chloroaniline **2a** (0.32 mL, 3.01 mmol) according to the procedure described for the preparation of **4**. Purification by flash silica chromatography (n-hexane/EtOAc 85:15) afforded (E)-N-(3-chlorophenyl)-3-(3-fluorophenyl)-prop-2-enamide **9** (298 mg 36%) as a beige powder.

<sup>1</sup>H NMR (400 MHz, DMSO-d<sub>6</sub>) δ 10.44 (s, 1H), 7.94 (m, 1H), 7.62 (d, J = 15.76 Hz, 1H), 7.64-7.47 (m, 4H), 7.38 (m, 1H), 7.29-7.23 (m, 1H), 7.15 (m, 1H), 6.84 (d, J = 15.76 Hz, 1H). m/z (ES<sup>+</sup>), (M + H)<sup>+</sup> = 276.

### (E)-N-(3-Chlorophenyl)-3-(3-nitrophenyl)-prop-2-enamide (10a)

Cinnamic anilide **10a** was obtained by coupling 3-nitrocinnamic acid **1h** (500 mg, 2.59 mmol) and 3-chloroaniline **2a** (0.27 mL, 2.59 mmol) according to the procedure described for the preparation of **4**. Purification by flash silica chromatography (n-hexane/EtOAc 80:20) afforded (E)-N-(3-chlorophenyl)-3-(3-nitrophenyl)-prop-2-enamide **10a** (152 mg 19%) as a light orange powder.

<sup>1</sup>H NMR (400 MHz, DMSO-d<sub>6</sub>) δ 10.49 (s, 1H), 8.41 (m, 1H), 8.26 (m, 1H), 8.09 (m, 1H), 7.95 (m, 1H), 7.72-7.78 (m, 2H), 7.53 (m, 1H), 7.39 (m, 1H), 7.15 (m, 1H), 7.00 (d, J = 15.6 Hz, 1H). m/z (ES<sup>+</sup>), (M + H)<sup>+</sup> = 303.

**(E)-N-(3-Chlorophenyl)-3-(3-hydroxy-4-methylphenyl)-prop-2-enamide (13)**

Cinnamic anilide **13** was obtained by coupling 3-hydroxy-4-methylcinnamic acid **1l** (178 mg, 1 mmol) and 3-chloroaniline **2a** (0.425 mL, 4.00 mmol) according to the procedure described for the preparation of **4**. Purification by flash silica chromatography (elution gradient: 0% to 2% MeOH in DCM) afforded (E)-N-(3-chlorophenyl)-3-(3-hydroxy-4-methylphenyl)-prop-2-enamide **13** (238 mg 65%) as a white powder.

<sup>1</sup>H NMR (400 MHz, DMSO-d<sub>6</sub>) δ 10.35 (s, 1H), 9.56 (s, 1H), 7.93 (s, 1H), 7.49 (m, 2H), 7.36 (m, 1H), 7.13 (m, 2H), 6.98 (m, 2H), 6.65 (d, *J* = 16 Hz, 1H), 2.15 (s, 3H). *m/z* (ES<sup>+</sup>), (M + H)<sup>+</sup> = 288.

**(E)-N-(3-Chlorophenyl)-3-(3-hydroxy-4-nitrophenyl)-prop-2-enamide (14a)**

Cinnamic anilide **14a** was obtained by coupling 3-hydroxy-4-nitrocinnamic acid **1m** (1.050 g, 5 mmol) and 3-chloroaniline **2a** (2.12 mL, 20.00 mmol) according to the procedure described for the preparation of **4**. Purification by flash silica chromatography (elution gradient: 0% to 2.5% MeOH in DCM) afforded (E)-N-(3-chlorophenyl)-3-(3-hydroxy-4-nitrophenyl)-prop-2-enamide **14a** (1.255 g 79%) as a white powder.

<sup>1</sup>H NMR (400 MHz, CDCl<sub>3</sub>) δ 10.64 (s, 1H), 8.16 (m, 1H), 7.77 (bs, 1H), 7.73 (d, *J* = 16.0 Hz, 1H), 7.39 (m, 1H), 7.32 (s, 1H), 7.30 (m, 2H), 7.17 (m, 2H), 6.65 (m, 1H). *m/z* (ES<sup>+</sup>), (M + H)<sup>+</sup> = 319.

**(E)-N-(3-Bromophenyl)-3-(3-hydroxy-4-methoxyphenyl)-prop-2-enamide (15)**

Cinnamic anilide **15** was obtained by coupling 3-hydroxy-4-methoxycinnamic acid **1d** (500 mg, 2.57 mmol) and 3-bromoaniline **2b** (0.28 mL, 2.57 mmol) according to the procedure described for the preparation of **4**. Purification by flash silica chromatography (n-hexane/EtOAc 60:40) afforded (E)-N-(3-bromophenyl)-3-(3-hydroxy-4-methoxyphenyl)-prop-2-enamide **15** (469 mg, 52%) as a white powder.

<sup>1</sup>H NMR (400 MHz, DMSO-d<sub>6</sub>) δ 10.26 (s, 1H), 9.24 (s, 1H), 8.06 (m, 1H), 7.56-7.54 (m, 1H), 7.46 (d, *J* = 15.6 Hz, 1H), 7.31-7.22 (m, 2H), 7.06-7.03 (m, 2H), 6.97 (m, 1H), 6.56 (d, *J* = 15.6 Hz, 1H), 3.81 (s, 3H). *m/z* (ES<sup>+</sup>), (2M + Na)<sup>+</sup> = 719.

**(E)-3-(3-Hydroxy-4-methoxyphenyl)-N-(3-methoxyphenyl)-prop-2-enamide (16)**

Cinnamic anilide **16** was obtained by coupling 3-hydroxy-4-methoxycinnamic acid **1d** (500 mg, 2.57 mmol) and *m*-anisidine **2c** (0.29 mL, 2.57 mmol) according to the procedure described for the preparation of **4**. Purification by flash silica chromatography (n-hexane/EtOAc 6:4) afforded (E)-3-(3-hydroxy-4-methoxyphenyl)-N-(3-methoxyphenyl)-prop-2-enamide **16** (429 mg, 56%) as a pale yellow powder.

<sup>1</sup>H NMR (400 MHz, DMSO-d<sub>6</sub>) δ 10.07 (s, 1H), 9.24 (s, 1H), 7.45-7.41 (m, 2H), 7.24-7.18 (m, 2H), 7.04-7.02 (m, 2H), 6.98-6.96 (m, 1H), 6.65-6.62 (m, 1H), 6.58 (d, *J* = 15.6 Hz, 1H), 3.81 (s, 3H), 3.74 (s, 3H). *m/z* (ES<sup>+</sup>), (2M + Na)<sup>+</sup> = 621.

**(E)-3-(3-Hydroxy-4-methoxyphenyl)-N-(3-isopropoxyphenyl)-prop-2-enamide (17)**

Cinnamic anilide **17** was obtained by coupling 3-hydroxy-4-methoxycinnamic acid **1d** (500 mg, 2.57 mmol) and 3-isopropoxyaniline **2d** (0.38 mL, 2.57 mmol) according to the procedure described for the preparation of **4**. Purification by flash silica chromatography (n-hexane/EtOAc 6:4) afforded (E)-3-(3-hydroxy-4-methoxyphenyl)-N-(3-isopropoxyphenyl)-prop-2-enamide **17** (311 mg, 37%) as a pale yellow powder.

<sup>1</sup>H NMR (400 MHz, DMSO-d<sub>6</sub>) δ 10.04 (s, 1H), 9.23 (s, 1H), 7.45-7.39 (m, 2H), 7.21-7.13 (m, 2H), 7.04-7.02 (m, 2H), 6.97 (d, *J* = 8.8 Hz, 1H), 6.62-6.56 (m, 2H), 4.54 (ep, *J* = 6.0 Hz, 1H), 3.81 (s, 3H), 1.27 (d, *J* = 6.0 Hz, 6H). *m/z* (ES<sup>+</sup>), (2M + Na)<sup>+</sup> = 677.

**(E)-3-(3-Hydroxy-4-methoxyphenyl)-N-(3-nitrophenyl)-prop-2-enamide (18a)**

Cinnamic anilide **18a** was obtained by coupling 3-hydroxy-4-methoxycinnamic acid **1d** (500 mg, 2.57 mmol) and 3-nitroaniline **2e** (355 mg, 2.57 mmol) according to the procedure described for the preparation of **4**. Purification by trituration with DCM afforded (E)-3-(3-hydroxy-4-methoxyphenyl)-N-(3-nitrophenyl)-prop-2-enamide **18a** (434 mg, 54%) as a yellow powder.

<sup>1</sup>H NMR (400 MHz, DMSO-d<sub>6</sub>) δ 10.57 (s, 1H), 9.25 (s, 1H), 8.73 (t, *J* = 2.0 Hz, 1H), 8.00-7.97 (m, 1H), 7.93-7.90 (m, 1H), 7.63 (t, *J* = 8.0 Hz, 1H), 7.51 (d, *J* = 15.6 Hz, 1H), 7.08-7.05 (m, 2H), 7.00-6.97 (m, 1H), 6.58 (d, *J* = 15.6 Hz, 1H), 3.82 (s, 3H). *m/z* (ES<sup>+</sup>), (M + H)<sup>+</sup> = 315.

**(E)-N-[3-(Dimethylamino)phenyl]-3-(3-hydroxy-4-methoxyphenyl)-prop-2-enamide (19)**

Cinnamic anilide **19** was obtained by coupling 3-hydroxy-4-methoxycinnamic acid **1d** (500 mg, 2.57 mmol) and N,N-dimethyl-1,3-phenylenediamine dihydrochloride **2f** (537 mg, 2.57 mmol) according to the

procedure described for the preparation of **4**. Purification by flash silica chromatography (n-hexane/EtOAc 6:4) afforded (E)-N-[3-(dimethylamino)phenyl]-3-(3-hydroxy-4-methoxyphenyl)-prop-2-enamide **19** (420 mg, 52%) as a yellow powder.

<sup>1</sup>H NMR (400 MHz, DMSO-d<sub>6</sub>) δ 9.88 (s, 1H), 9.20 (s, 1H), 7.40 (d, *J* = 15.6 Hz, 1H), 7.12-7.08 (m, 2H), 7.03-7.00 (m, 3H), 6.97 (d, *J* = 8.0 Hz, 1H), 6.59 (d, *J* = 15.6 Hz, 1H), 6.44 (dd, *J* = 8.4 Hz, *J* = 2.0 Hz, 1H), 3.81 (s, 3H), 2.88 (s, 6H). *m/z* (ES<sup>+</sup>), (2M + Na)<sup>+</sup> = 647.

#### (E)-N-(2-Chlorophenyl)-3-(3-hydroxy-4-methoxyphenyl)-prop-2-enamide (**20**)

Cinnamic anilide **20** was obtained by coupling 3-hydroxy-4-methoxycinnamic acid **1d** (770 mg, 3.96 mmol) and 2-chloroaniline **2g** (0.41 mL, 3.96 mmol) according to the procedure described for the preparation of **4**. Purification by flash silica chromatography (n-hexane/EtOAc 8:2) afforded (E)-N-(2-chlorophenyl)-3-(3-hydroxy-4-methoxyphenyl)-prop-2-enamide **20** (200 mg, 17%) as an off white powder.

<sup>1</sup>H NMR (400 MHz, DMSO-d<sub>6</sub>) δ 8.53 (m, 1H), 7.74 (m, 1H), 7.68 (d, *J* = 15, 1H), 7.39 (m, 1H), 7.30 (m, 1H), 7.19 (m, 1H), 7.06 (m, 2H), 6.44 (d, *J* = 15, 1H), 3.94 (s, 3H). *m/z* (ES<sup>+</sup>), (M + H)<sup>+</sup> = 304.

#### (E)-N-(4-Chlorophenyl)-3-(3-hydroxy-4-methoxyphenyl)-prop-2-enamide (**21**)

Cinnamic anilide **21** was obtained by coupling 3-hydroxy-4-methoxycinnamic acid **1d** (500 mg, 2.57 mmol) and 4-chloroaniline **2h** (328 mg, 2.57 mmol) according to the procedure described for the preparation of **4**. Purification by flash silica chromatography (elution gradient: 30% to 40% EtOAc in n-hexane) afforded (E)-N-(4-chlorophenyl)-3-(3-hydroxy-4-methoxyphenyl)-prop-2-enamide **21** (143 mg, 18%) as an off white powder.

<sup>1</sup>H NMR (400 MHz, DMSO-d<sub>6</sub>) δ 10.23 (s, 1H), 9.25 (s, 1H), 7.71 (AB system, 2H), 7.44 (d, *J* = 15.6, 1H), 7.38 (AB system, 2H), 7.05-7.03 (m, 2H), 6.98-6.96 (m, 1H), 6.57 (d, *J* = 15.6, 1H), 3.81 (s, 3H). *m/z* (ES<sup>+</sup>), (2M + Na)<sup>+</sup> = 629.

#### (E)-3-(4-Fluoro-3-hydroxyphenyl)-N-(1-naphthyl)prop-2-enamide (**22**)

Cinnamic anilide **22** was obtained by coupling 4-fluoro-3-hydroxycinnamic acid **1m** (195 mg, 1.07 mmol) and 1-naphthylamine **2i** (328 mg, 2.57 mmol) according to the procedure described for the preparation of **4**. Purification by flash silica chromatography (n-hexane/EtOAc 7:3) afforded (E)-3-(4-fluoro-3-hydroxyphenyl)-N-(1-naphthyl)-prop-2-enamide **22** (120 mg, 36%) as an off white powder.

<sup>1</sup>H NMR (400 MHz, DMSO-d<sub>6</sub>) δ 10.13 (s, 2H), 8.16 (m, 1H), 7.98-7.90 (m, 2H), 7.79 (d, *J* = 8Hz, 1H), 7.61-7.52 (m, 4H), 7.24 (m, 2H), 7.18 (m,bs, 1H), 7.01 (d, *J* = 15.2Hz, 1H). *m/z* (ES<sup>+</sup>), (M + H)<sup>+</sup> = 308.

#### (E)-N-(3-Chlorophenyl)-3-(4-fluoro-3-hydroxy-phenyl)-prop-2-enamide (**23**)

Cinnamic anilide **23** was obtained by coupling 4-fluoro-3-hydroxycinnamic acid **1m** (159 mg, 0.87 mmol) and 3-chloroaniline **2a** (0.23 mL, 2.2 mmol) according to the procedure described for the preparation of **4**. Purification by sequential trituration with toluene, ethyl ether and DCM afforded (E)-N-(3-chlorophenyl)-3-(4-fluoro-3-hydroxyphenyl)-prop-2-enamide **23** (86 mg, 34%) as an off white powder.

<sup>1</sup>H NMR (400 MHz, DMSO-d<sub>6</sub>) δ 10.38 (s, 1H), 10.15 (s, 1H), 7.94 (bs, 1H), 7.54-7.49 (m, 2H), 7.39-7.35 (m, 1H), 7.22-7.20 (m, 2H), 7.15-7.08 (m, 2H), 6.64 (d, *J* = 15.6Hz, H). *m/z* (ES<sup>+</sup>), (M + H)<sup>+</sup> = 292.

#### (E)-N-(3,4-Dichlorophenyl)-3-(3-acetoxy-4-methoxyphenyl)prop-2-enamide (**25a**)

Cinnamic anilide **25a** was obtained by coupling 3-acetoxy-4-methoxycinnamic acid **1n** (354 mg, 1.5 mmol) and 3,4-dichloroaniline **2k** (292 mg, 1.8 mmol) according to the procedure described for the preparation of **24a**. Purification by flash silica chromatography (n-hexane/ethyl acetate 77:23) afforded (E)-N-(3,4-dichlorophenyl)-3-(3-acetoxy-4-methoxyphenyl)prop-2-enamide **25a** (200 mg, 44%) as a white powder.

<sup>1</sup>H NMR (400 MHz, DMSO-d<sub>6</sub>) δ 10.42 (s, 1H), 8.10 (d, *J* = 2.0 Hz, 1H), 7.60-7.53 (m, 4H), 7.40 (d, *J* = 2.0 Hz, 1H), 7.21 (d, *J* = 8.8 Hz, 1H), 6.65 (d, *J* = 16.0 Hz, 1H), 3.83 (s, 3H), 2.28 (s, 3H). *m/z* (ES<sup>+</sup>), (M + H)<sup>+</sup> = 380.

#### (E)-N-(3,4-Dichlorophenyl)-3-(3-hydroxy-4-methoxyphenyl)prop-2-enamide (**25**)

Cinnamic anilide **25** was obtained by heating at reflux a suspension of (E)-N-(3,4-dichlorophenyl)-3-(3-acetoxy-4-methoxy-phenyl)prop-2-enamide **25a** (194 mg, 0.51 mmol) and NaOH (50% in water) (54 μL, 1.02 mmol) in MeOH (5 mL) according to the procedure described for the preparation of **24**. (E)-N-(3,4-dichlorophenyl)-3-(3-hydroxy-4-methoxyphenyl)prop-2-enamide **25** (150 mg, 87%) was obtained as a white powder.

<sup>1</sup>H NMR (400 MHz, DMSO-d<sub>6</sub>) δ 10.39 (s, 1H), 9.26 (s, 1H), 8.10 (d, *J* = 2.0 Hz, 1H), 7.60-7.54 (m, 2H), 7.47 (d, *J* = 15.6 Hz, 1H), 7.06-7.04 (m, 2H), 6.98 (d, *J* = 8.8 Hz, 1H), 6.54 (d, *J* = 15.6 Hz, 1H), 3.81 (s, 3H). *m/z* (ES<sup>+</sup>), (2M + Na)<sup>+</sup> = 699.

**(E)-N-(3-Chloro-4-methoxyphenyl)-3-(3-acetoxy-4-methoxyphenyl)prop-2-enamide (26a)**

Cinnamic anilide **26a** was obtained by coupling 3-acetoxy-4-methoxycinnamic acid **1n** (354 mg, 1.5 mmol) and 3-chloro-4-methoxy-aniline **2l** (331 mg, 2.1 mmol) according to the procedure described for the preparation of **24a**. Purification by flash silica chromatography (n-hexane/ethyl acetate 6:4) afforded (E)-N-(3-chloro-4-methoxyphenyl)-3-(3-hydroxy-4-methoxyphenyl)prop-2-enamide **26a** (390 mg, 69%) as a beige powder.

<sup>1</sup>H NMR (400 MHz, DMSO-d<sub>6</sub>) δ 10.14 (s, 1H), 7.90 (d, *J* = 2.0 Hz, 1H), 7.53-7.49 (m, 3H), 7.37 (d, *J* = 2.4 Hz, 1H), 7.20 (d, *J* = 8.4 Hz, 1H), 7.13 (d, *J* = 9.2 Hz, 1H), 6.63 (d, *J* = 15.6 Hz, 1H), 3.83 (s, 3H), 3.82 (s, 3H), 2.28 (s, 3H). *m/z* (ES<sup>+</sup>), (M + H)<sup>+</sup> = 376.

**(E)-N-(3-Chloro-4-methoxyphenyl)-3-(3-hydroxy-4-methoxyphenyl)prop-2-enamide (26)**

Cinnamic anilide **26** was obtained by heating at reflux a suspension of (E)-N-(3-chloro-4-methoxy-phenyl)-3-(3-acetoxy-4-methoxy-phenyl)prop-2-enamide **26a** (376 mg, 1 mmol) and NaOH (50% in water) (106 μL, 2 mmol) in MeOH (6 mL) according to the procedure described for the preparation of **24**. (E)-N-(3-chloro-4-methoxyphenyl)-3-(3-hydroxy-4-methoxyphenyl)prop-2-enamide **26** (310 mg, 93%) was obtained as a pale yellow powder.

<sup>1</sup>H NMR (400 MHz, DMSO-d<sub>6</sub>) δ 10.11 (s, 1H), 9.24 (s, 1H), 7.89 (d, *J* = 2.4 Hz, 1H), 7.50 (dd, *J* = 8.8 Hz, *J* = 2.4 Hz, 1H), 7.42 (d, *J* = 15.6 Hz, 1H), 7.13 (d, *J* = 9.2 Hz, 1H), 7.04-7.02 (m, 2H), 6.97 (d, *J* = 8.8 Hz, 1H), 6.53 (d, *J* = 15.6 Hz, 1H), 3.82 (s, 3H), 3.81 (s, 3H). *m/z* (ES<sup>+</sup>), (2M + Na)<sup>+</sup> = 689.

**(E)-N-(3-Chloro-2-methoxyphenyl)-3-(3-acetoxy-4-methoxyphenyl)prop-2-enamide (27a)**

Cinnamic anilide **27a** was obtained by coupling 3-acetoxy-4-methoxycinnamic acid **1n** (354 mg, 1.5 mmol) and 3-chloro-2-methoxy-aniline **2m** (284 mg, 1.8 mmol) according to the procedure described for the preparation of **24a**. Purification by flash silica chromatography (eluent: n-hexane/ethyl acetate 8:2) afforded (E)-N-(3-chloro-2-methoxyphenyl)-3-(3-acetoxy-4-methoxyphenyl)prop-2-enamide **27a** (180 mg, 32%) as a pale yellow powder.

<sup>1</sup>H NMR (400 MHz, DMSO-d<sub>6</sub>) δ 9.51 (s, 1H), 8.23 (dd, *J* = 8.0 Hz, *J* = 1.6 Hz, 1H), 7.55-7.51 (m, 2H), 7.40 (d, *J* = 2.4 Hz, 1H), 7.22-7.19 (m, 2H), 7.16-7.11 (m, 2H), 3.83 (s, 3H), 3.80 (s, 3H), 2.29 (s, 3H). *m/z* (ES<sup>+</sup>), (M + H)<sup>+</sup> = 376.

**(E)-N-(3-Chloro-2-methoxyphenyl)-3-(3-hydroxy-4-methoxyphenyl)prop-2-enamide (27)**

Cinnamic anilide **27** was obtained by heating at reflux a suspension of (E)-N-(3-chloro-2-methoxy-phenyl)-3-(3-acetoxy-4-methoxy-phenyl)prop-2-enamide **27a** (175 mg, 0.465 mmol) and NaOH (50% in water) (49 μL, 0.93 mmol) in MeOH (4 mL) according to the procedure described for the preparation of **24**. (E)-N-(3-chloro-2-methoxyphenyl)-3-(3-hydroxy-4-methoxyphenyl)prop-2-enamide **27** (115 mg, 74%) was obtained as a beige powder.

<sup>1</sup>H NMR (400 MHz, DMSO-d<sub>6</sub>) δ 9.56 (s, 1H), 9.20 (s, 1H), 8.21-8.19 (m, 1H), 7.45 (d, *J* = 15.6 Hz, 1H), 7.20 (dd, *J* = 8.4 Hz, *J* = 2.0 Hz, 1H), 7.13 (t, *J* = 8.4 Hz, 1H), 7.08-6.97 (m, 4H), 3.82 (s, 3H), 3.80 (s, 3H). *m/z* (ES<sup>+</sup>), (2M + Na)<sup>+</sup> = 689.

**(E)-3-(3-Acetoxy-4-methoxyphenyl)-N-indan-1-yl-acrylamide (28a)**

Cinnamic anilide **28a** was obtained by coupling 3-acetoxy-4-hydroxycinnamic acid **1n** (236 mg, 1 mmol) and indan-1-amine **2n** (0.13 mL, 1.0 mmol) according to the procedure described for the preparation of **4**. Purification by trituration in diethyl ether afforded (E)-3-(3-acetoxy-4-methoxyphenyl)-N-indan-1-yl-acrylamide **28a** (290 mg, 82%) as a dark brown powder.

<sup>1</sup>H NMR (400 MHz, DMSO-d<sub>6</sub>) δ 8.39 (m, 1H), 7.46-7.41 (m, 2H), 7.30 (m, 1H), 7.28-7.26 (m, 1H), 7.24-7.16 (m, 4H), 6.54 (d, *J* = 15.6 Hz, 1H), 5.40 (q, *J* = 7.6 Hz, 1H), 3.81 (s, 3H), 2.99-2.92 (m, 1H), 2.87-2.79 (m, 1H), 2.48-2.40 (m, 1H), 2.27 (s, 3H), 1.86-1.82 (m, 1H). *m/z* (ES<sup>+</sup>), (M + H)<sup>+</sup> = 352.

**(E)-N-(3-Chloro-4-methoxyphenyl)-3-(3-hydroxy-4-methoxyphenyl)prop-2-enamide (26)**

Cinnamic anilide **26** was obtained by heating at reflux a suspension of (E)-N-(3-chloro-4-methoxy-phenyl)-3-(3-acetoxy-4-methoxy-phenyl)prop-2-enamide **26a** (376 mg, 1 mmol) and NaOH (50% in water) (106  $\mu$ L, 2 mmol) in MeOH (6 mL) according to the procedure described for the preparation of **24**. (E)-N-(3-chloro-4-methoxyphenyl)-3-(3-hydroxy-4-methoxyphenyl)prop-2-enamide **26** (310 mg, 93%) was obtained as a pale yellow powder.

$^1\text{H}$  NMR (400 MHz, DMSO- $d_6$ )  $\delta$  10.11 (s, 1H), 9.24 (s, 1H), 7.89 (d,  $J$  = 2.4 Hz, 1H), 7.50 (dd,  $J$  = 8.8 Hz,  $J$  = 2.4 Hz, 1H), 7.42 (d,  $J$  = 15.6 Hz, 1H), 7.13 (d,  $J$  = 9.2 Hz, 1H), 7.04-7.02 (m, 2H), 6.97 (d,  $J$  = 8.8 Hz, 1H), 6.53 (d,  $J$  = 15.6 Hz, 1H), 3.82 (s, 3H), 3.81 (s, 3H).  $m/z$  (ES+),  $(2M + Na)^+ = 689$ .

#### (E)-N-(3-Chloro-2-methoxyphenyl)-3-(3-acetoxy-4-methoxyphenyl)prop-2-enamide (27a)

Cinnamic anilide **27a** was obtained by coupling 3-acetoxy-4-methoxycinnamic acid **1n** (354 mg, 1.5 mmol) and 3-chloro-2-methoxy-aniline **2m** (284 mg, 1.8 mmol) according to the procedure described for the preparation of **24a**. Purification by flash silica chromatography (eluent: n-hexane/ethyl acetate 8:2) afforded (E)-N-(3-chloro-2-methoxyphenyl)-3-(3-acetoxy-4-methoxyphenyl)prop-2-enamide **27a** (180 mg, 32%) as a pale yellow powder.

$^1\text{H}$  NMR (400 MHz, DMSO- $d_6$ )  $\delta$  9.51 (s, 1H), 8.23 (dd,  $J$  = 8.0 Hz,  $J$  = 1.6 Hz, 1H), 7.55-7.51 (m, 2H), 7.40 (d,  $J$  = 2.4 Hz, 1H), 7.22-7.19 (m, 2H), 7.16-7.11 (m, 2H), 3.83 (s, 3H), 3.80 (s, 3H), 2.29 (s, 3H).  $m/z$  (ES+),  $(M + H)^+ = 376$ .

#### (E)-N-(3-Chloro-2-methoxyphenyl)-3-(3-hydroxy-4-methoxyphenyl)prop-2-enamide (27)

Cinnamic anilide **27** was obtained by heating at reflux a suspension of (E)-N-(3-chloro-2-methoxy-phenyl)-3-(3-acetoxy-4-methoxy-phenyl)prop-2-enamide **27a** (175 mg, 0.465 mmol) and NaOH (50% in water) (49  $\mu$ L, 0.93 mmol) in MeOH (4 mL) according to the procedure described for the preparation of **24**. (E)-N-(3-chloro-2-methoxyphenyl)-3-(3-hydroxy-4-methoxyphenyl)prop-2-enamide **27** (115 mg, 74%) was obtained as a beige powder.

$^1\text{H}$  NMR (400 MHz, DMSO- $d_6$ )  $\delta$  9.56 (s, 1H), 9.20 (s, 1H), 8.21-8.19 (m, 1H), 7.45 (d,  $J$  = 15.6 Hz, 1H), 7.20 (dd,  $J$  = 8.4 Hz,  $J$  = 2.0 Hz, 1H), 7.13 (t,  $J$  = 8.4 Hz, 1H), 7.08-6.97 (m, 4H), 3.82 (s, 3H), 3.80 (s, 3H).  $m/z$  (ES+),  $(2M + Na)^+ = 689$ .

#### (E)-3-(3-Acetoxy-4-methoxyphenyl)-N-indan-1-yl-acrylamide (28a)

Cinnamic anilide **28a** was obtained by coupling 3-acetoxy-4-hydroxycinnamic acid **1n** (236 mg, 1 mmol) and indan-1-amine **2n** (0.13 mL, 1.0 mmol) according to the procedure described for the preparation of **4**. Purification by trituration in diethyl ether afforded (E)-3-(3-acetoxy-4-methoxyphenyl)-N-indan-1-yl-acrylamide **28a** (290 mg, 82%) as a dark brown powder.

$^1\text{H}$  NMR (400 MHz, DMSO- $d_6$ )  $\delta$  8.39 (m, 1H), 7.46-7.41 (m, 2H), 7.30 (m, 1H), 7.28-7.26 (m, 1H), 7.24-7.16 (m, 4H), 6.54 (d,  $J$  = 15.6 Hz, 1H), 5.40 (q,  $J$  = 7.6 Hz, 1H), 3.81 (s, 3H), 2.99-2.92 (m, 1H), 2.87-2.79 (m, 1H), 2.48-2.40 (m, 1H), 2.27 (s, 3H), 1.86-1.82 (m, 1H).  $m/z$  (ES+),  $(M + H)^+ = 352$ .

#### (E)-3-(3-Acetoxy-4-methoxyphenyl)-N-(2-naphthyl)-prop-2-enamide (29a)

Cinnamic anilide **29a** was obtained by coupling 3-acetoxy-4-hydroxycinnamic acid **1n** (211 mg, 0.8 mmol) and 2-naphthylamine **2o** (100 mg, 0.7 mmol) according to the procedure described for the preparation of **4**. Purification by flash silica chromatography (elution gradient: 1% to 7% EtOAc in n-hexane) afforded (E)-3-(3-acetoxy-4-methoxyphenyl)-N-(2-naphthyl)-prop-2-enamide **29a** (81.5 mg, 33%) as a light brown powder.

$^1\text{H}$  NMR (500 MHz, DMSO- $d_6$ )  $\delta$  10.34 (s, 1H), 8.45 - 8.33 (m, 1H), 7.91 - 7.81 (m, 3H), 7.69 - 7.63 (m, 1H), 7.59 - 7.52 (m, 2H), 7.50 - 7.44 (m, 1H), 7.44 - 7.36 (m, 2H), 7.25 - 7.19 (m, 1H), 6.76 (d,  $J$  = 15.7 Hz, 1H), 3.83 (s, 3H), 3.80 - 3.76 (m, 1H), 2.29 (s, 3H).  $m/z$  (ES+),  $(M + H)^+ = 362$ .

#### (E)-3-(3-Acetoxy-4-methoxyphenyl)-N-(1-naphthyl)prop-2-enamide (30a)

Cinnamic anilide **30a** was obtained by coupling 3-acetoxy-4-methoxycinnamic acid **1n** (354 mg, 1.5 mmol) and naphthalen-1-amine **2p** (215 mg, 1.5 mmol) according to the procedure described for the preparation of **24a**. The reaction mixture was stirred at room temperature for 4 days. Purification by flash silica chromatography (DCM/MeOH 100:1) afforded (E)-3-(3-acetoxy-4-methoxyphenyl)-N-(1-naphthyl)prop-2-enamide **30a** (255 mg, 47%) as a pale yellow powder.



<sup>1</sup>H NMR (400 MHz, DMSO-d<sub>6</sub>) δ 10.03 (s, 1H), 8.17-8.15 (m, 1H), 7.97-7.92 (m, 2H), 7.77 (d, *J* = 8.4 Hz, 1H), 7.60-7.50 (m, 5H), 7.42 (d, *J* = 1.6 Hz, 1H), 7.23 (d, *J* = 8.4 Hz, 1H), 7.03 (d, *J* = 15.6 Hz, 1H), 3.84 (s, 3H), 2.30 (s, 3H). *m/z* (ES<sup>+</sup>), (*M* + *H*)<sup>+</sup> = 362.

**(E)-3-(3-Hydroxy-4-methoxyphenyl)-N-(1-naphthyl)prop-2-enamide (30)**

Cinnamic anilide **30** was obtained by heating at reflux a suspension of (E)-3-(3-acetoxy-4-methoxyphenyl)-N-(1-naphthyl)prop-2-enamide **30a** (175 mg, 0.465 mmol) and NaOH (50% in water) (49 μL, 0.93 mmol) in MeOH (4 mL) according to the procedure described for the preparation of **24**. (E)-3-(3-hydroxy-4-methoxyphenyl)-N-(1-naphthyl)prop-2-enamide **30** (213 mg, 95%) was obtained as a white powder.

<sup>1</sup>H NMR (400 MHz, DMSO-d<sub>6</sub>) δ 10.04 (s, 1H), 9.24 (s, 1H), 8.16 (d, *J* = 8.4 Hz, 1H), 7.96-7.94 (m, 1H), 7.90 (d, *J* = 7.2 Hz, 1H), 7.76 (d, *J* = 8.4 Hz, 1H), 7.60-7.47 (m, 4H), 7.10-7.06 (m, 2H), 6.99 (d, *J* = 8.0 Hz, 1H), 6.93 (d, *J* = 15.6 Hz, 1H), 3.83 (s, 3H). *m/z* (ES<sup>+</sup>), (2*M* + Na)<sup>+</sup> = 661.

**(E)-N-(1,3-Benzoxazol-4-yl)-3-(3-hydroxy-4-methoxyphenyl)prop-2-enamide (31)**

Cinnamic anilide **31** was obtained by heating at reflux a suspension of (E)-N-Benzoxazol-4-yl-3-(3-acetoxy-4-methoxyphenyl)prop-2-enamide **31a** (50 mg, 0.14 mmol) and NaOH (50% in water) (15 μL, 0.28 mmol) in MeOH (1.5 mL) according to the procedure described for the preparation of **24**. Purification by trituration in diethyl ether afforded (E)-N-(1,3-benzoxazol-4-yl)-3-(3-hydroxy-4-methoxyphenyl)prop-2-enamide **31** (12 mg, 27%) as a beige powder.

<sup>1</sup>H NMR (400 MHz, DMSO-d<sub>6</sub>) δ 10.37 (s, 1H), 9.30 (s, 1H), 8.66 (s, 1H), 8.33 (m, 1H), 7.51 (m, 3H), 7.12 (m, 4H), 3.88 (s, 3H). *m/z* (ES<sup>+</sup>), (*M* + *H*)<sup>+</sup> = 311.

**(E)-3-(3-Acetoxy-4-methoxyphenyl)-N-(1-methyl-1H-benzimidazol-2-yl)prop-2-enamide (33a)**

Cinnamic anilide **33a** was obtained by coupling 3-acetoxy-4-hydroxycinnamic acid **1n** (236 mg, 1 mmol) and 2-amino-1-methyl-benzimidazole **2s** (0.15 mL, 1.0 mmol) according to the procedure described for the preparation of **4**. Purification by flash silica chromatography (DCM/MeOH 99:1) afforded (E)-3-(3-acetoxy-4-methoxyphenyl)-N-(1-methyl-1H-benzimidazol-2-yl)prop-2-enamide **33a** (65 mg, 18%) as a light yellow powder.

<sup>1</sup>H NMR (400 MHz, DMSO-d<sub>6</sub>) δ 7.60-7.48 (m, 5H), 7.26-7.17 (m, 3H), 6.66 (d, *J* = 15.2 Hz, 1H), 3.82 (s, 3H), 3.64 (s, 3H), 2.28 (s, 3H). *m/z* (ES<sup>+</sup>), (*M* + *H*)<sup>+</sup> = 366.

**(E)-3-(3-Hydroxy-4-methoxyphenyl)-N-(1-methyl-1H-benzimidazol-2-yl)prop-2-enamide hydrochloride (33)**

Cinnamic anilide **33** was obtained by hydrolysis of (E)-3-(3-acetoxy-4-methoxyphenyl)-N-(1-methyl-1H-benzimidazol-2-yl)prop-2-enamide **33a** (40 mg, 0.11 mmol) using 3N HCl in MeOH (2ml) according to the procedure described for the preparation of **28**. Purification by trituration in diethyl ether afforded (E)-3-(3-Hydroxy-4-methoxyphenyl)-N-(1-methyl-1H-benzimidazol-2-yl)prop-2-enamide hydrochloride **33** (31 mg, 78%) as a beige powder.

<sup>1</sup>H NMR (400 MHz, DMSO-d<sub>6</sub>) δ 9.42 (bs, 1H), 7.78-7.72 (m, 3H), 7.51-7.44 (m, 2H), 7.19-7.11 (m, 3H), 7.03 (d, *J* = 8.4 Hz, 1H), 3.96 (s, 3H), 3.84 (s, 3H). *m/z* (ES<sup>+</sup>), (*M* + *H*)<sup>+</sup> = 324.

**(E)-N-(3-Chlorophenyl)-3-(3-acetoxy-4-methoxyphenyl)-N-methyl-prop-2-enamide (34a)**

Cinnamic anilide **34a** was obtained by coupling 3-acetoxy-4-methoxycinnamic acid **1n** (472 mg, 2 mmol) and 3-chloro-N-methyl-aniline **2t** (252 mg, 2.0 mmol) according to the procedure described for the preparation of **24a**. The reaction mixture was stirred at room temperature overnight and then at reflux for 18 h. Purification by flash silica chromatography (n-hexane/ethyl acetate 7:3) afforded (E)-N-(3-chlorophenyl)-3-(3-acetoxy-4-methoxyphenyl)-N-methyl-prop-2-enamide **34a** (450 mg, 62%) as a brown oil.

<sup>1</sup>H NMR (400 MHz, DMSO-d<sub>6</sub>) δ 7.63 (d, *J* = 15.6 Hz, 1H), 7.41-7.35 (m, 2H), 7.23 (dd, *J* = 8.4 Hz, *J* = 2.0 Hz, 1H), 7.14-7.12 (m, 1H), 7.03 (d, *J* = 2.0 Hz, 1H), 6.91 (d, *J* = 8.8 Hz, 1H), 6.21 (d, *J* = 15.6 Hz, 1H), 4.72 (t, *J* = 5.6 Hz, 1H), 3.84 (s, 3H), 3.40 (s, 3H), 2.31 (s, 3H). *m/z* (ES<sup>+</sup>), (*M* + *H*)<sup>+</sup> = 360.

**(E)-N-(3-Chlorophenyl)-3-(3-hydroxy-4-methoxyphenyl)-N-methyl-prop-2-enamide (34)**

Cinnamic anilide **34** was obtained by heating at reflux a suspension of (E)-N-(3-chlorophenyl)-3-(3-acetoxy-4-methoxyphenyl)-N-methyl-prop-2-enamide **34a** (435 mg, 1.21 mmol) and NaOH (50% in water) (128 μL, 2.42 mmol) in MeOH (5 mL) according to the procedure described for the preparation of **24**. (E)-N-(3-

chlorophenyl)-3-(3-hydroxy-4-methoxy-phenyl)-N-methyl-prop-2-enamide **34** (360 mg, 93%) was obtained as a yellow powder.

<sup>1</sup>H NMR (400 MHz, DMSO-d<sub>6</sub>) δ 9.14 (s, 1H), 7.51-7.45 (m, 3H), 7.39 (d, *J* = 15.6 Hz, 1H), 7.31 (d, *J* = 7.6 Hz, 1H), 6.88 (s, 2H), 6.80 (s, 1H), 6.19 (d, *J* = 15.6 Hz, 1H), 3.76 (s, 3H), 3.29 (s, 3H). *m/z* (ES<sup>+</sup>), (2M + Na)<sup>+</sup> = 657.

#### Plasma concentration of compound **22** in the rat telemetry study

The plasma concentration was also determined using a satellite group (n=3) treated at the same dose of 30 mg/kg i.v. At this dose **22** showed a plasma concentration after 5 min of 74 μM that reduced to 0.05 μM after 240 min from the i.v. injection and lasted up to 24 h at a level of 0.01 μM.

The compound was cleared less rapidly than in the rabbit showing a *t*<sub>½</sub> of about 300 min. Notwithstanding the very high plasma concentration, which reached values well above those observed in the efficacy experiment, compound **22** at the dose of 30 mg/kg i.v. in the rat did not alter the monitored cardiovascular parameters.

**Increase of the calcium retention capacity of mouse liver mitochondria after incubation with different concentrations of inhibitor**

| <b>Inhibitor concentration (<math>\mu\text{M}</math>)</b> | <b>0.1</b>                                        | <b>0.5</b> | <b>1</b> | <b>5</b> |
|-----------------------------------------------------------|---------------------------------------------------|------------|----------|----------|
| <b>compd.</b>                                             | <b><math>\text{CRC}_i / \text{CRC}_0</math> %</b> |            |          |          |
| 3                                                         | 109                                               | 131        | 155      | 190      |
| 4                                                         | 102                                               | 120        | 136      | 110      |
| 5                                                         | 89                                                | 84         | 87       | 85       |
| 6                                                         | 121                                               | 161        | 186      | 172      |
| 7                                                         | 97                                                | 98         | 93       | 92       |
| 8                                                         | 79                                                | 91         | 75       | 83       |
| 9                                                         | 84                                                | 91         | 90       | 94       |
| 10                                                        | 93                                                | 89         | 94       | 95       |
| 11                                                        | 91                                                | 90         | 91       | 89       |
| 12                                                        | 81                                                | 86         | 87       | 89       |
| 13                                                        | 108                                               | 125        | 133      | 182      |
| 14                                                        | 90                                                | 97         | 102      | 154      |
| 15                                                        | 115                                               | 119        | 139      | 188      |
| 16                                                        | 128                                               | 146        | 170      | 270      |
| 17                                                        | 114                                               | 114        | 116      | 119      |
| 18                                                        | 114                                               | 108        | 106      | 124      |
| 19                                                        | 111                                               | 109        | 114      | 144      |
| 20                                                        | 126                                               | 156        | 165      | 266      |
| 21                                                        | 132                                               | 163        | 194      | 300      |
| 22                                                        | 266                                               | 340        | 413      | 557      |
| 23                                                        | 114                                               | 156        | 175      | 141      |
| 24                                                        | 115                                               | 115        | 115      | 108      |
| 25                                                        | 127                                               | 160        | 216      | 343      |
| 26                                                        | 132                                               | 173        | 196      | 320      |
| 27                                                        | 128                                               | 146        | 158      | 248      |
| 28                                                        | 155                                               | 188        | 219      | 338      |
| 29                                                        | 132                                               | 170        | 201      | 305      |
| 30                                                        | 228                                               | 295        | 358      | 547      |
| 31                                                        | 116                                               | 138        | 147      | 231      |
| 32                                                        | 104                                               | 113        | 115      | 154      |
| 33                                                        | 132                                               | 150        | 176      | 285      |
| 34                                                        | 105                                               | 100        | 103      | 99       |
| 37                                                        | 108                                               | 109        | 106      | 109      |
| 41                                                        | 110                                               | 112        | 107      | 103      |
| 44                                                        | na                                                | na         | 106      | na       |
| 46                                                        | 104                                               | 108        | 108      | 108      |
